# Supplementary material for: Osteocalcin induces phosphorylation of FOXO1 in human beta-cells and restores insulin expression under hyperglycemic conditions
Source: Research Square preprint supplement (doi:10.21203/rs.3.rs-6474216/v1), 2025-06-13
Supplement: Supplementary file 1 [file 1501a0ecf6409583513b0d93.pdf]

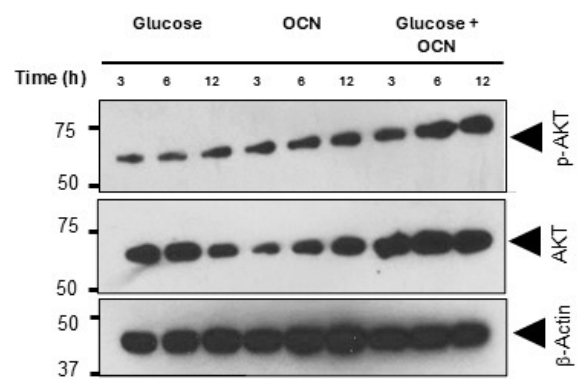

Fig. S1. Osteocalcin induces FOXO1 phosphorylation in 1.2B4 β-cells in an AKT-dependent manner. OC-induced AKT phosphorylation in high glucose (16.7mM) with a peak at 6 h as determined by western blot analysis.
